# Supplementary material for: Dimerization of kringle 1 domain from hepatocyte growth factor/scatter factor provides a potent MET receptor agonist
Source: PubMed Central journal article supplement (PMC9348577; doi:10.26508/lsa.202201424), 2022-07-29

Fig. 5A

Full scan of argentic films of blotted membranes after reassembly

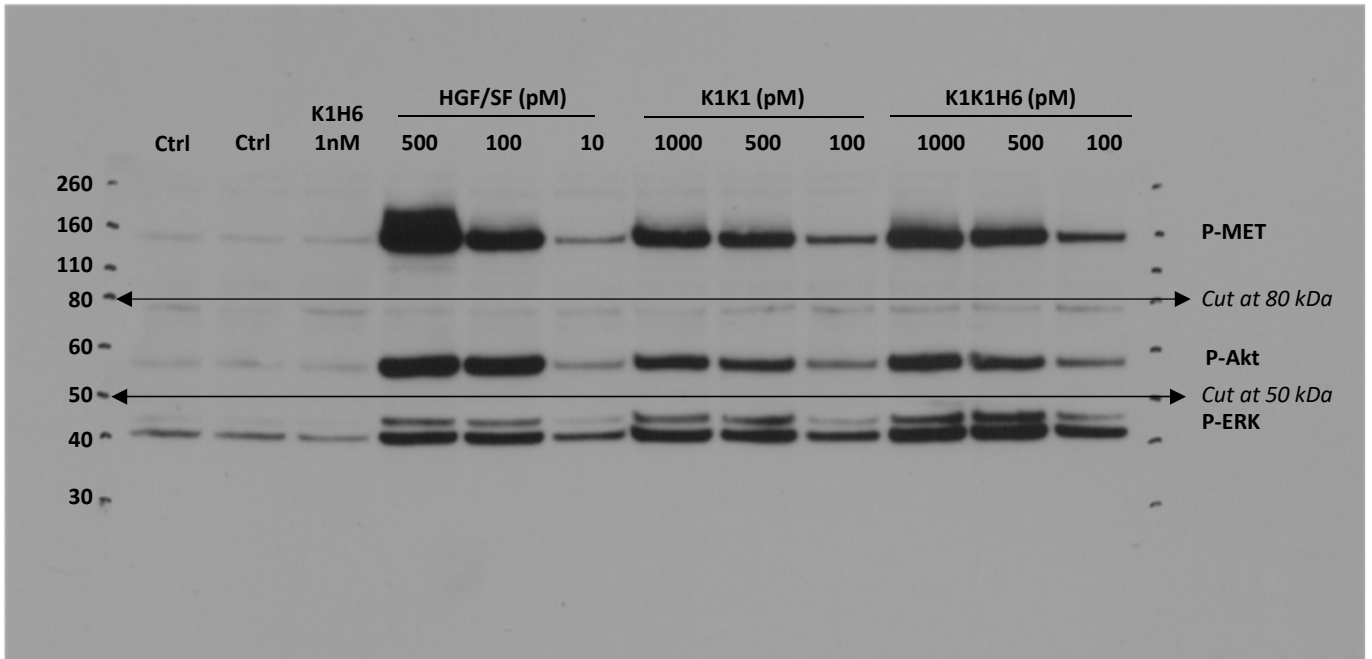

Membranes stripped and reprobed

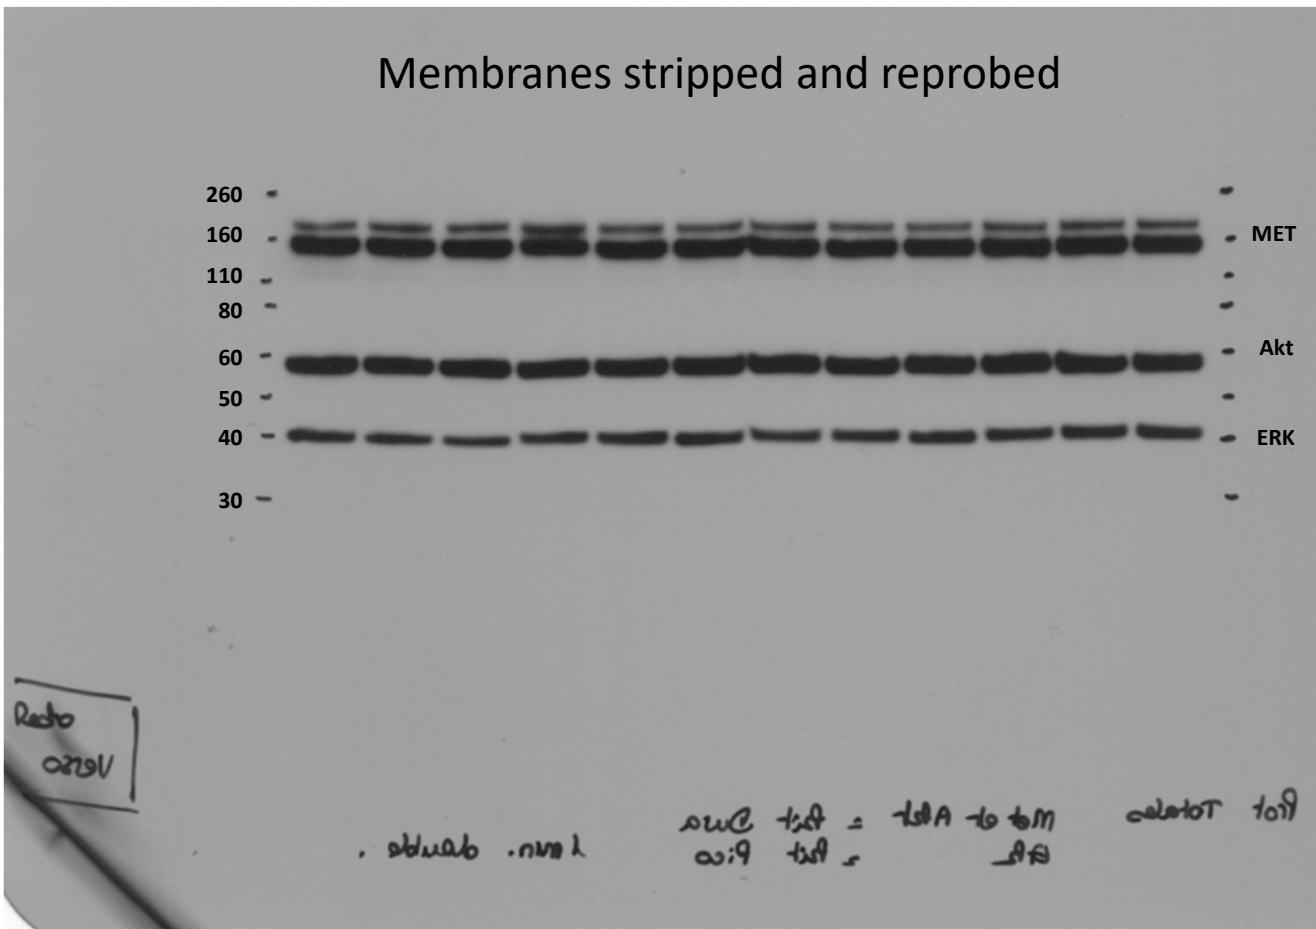

Supplement: LSA-2022-01424_SdataF5.1.pdf [file LSA-2022-01424_SdataF5.1.pdf]
