# Supplementary material for: Dimerization of kringle 1 domain from hepatocyte growth factor/scatter factor provides a potent MET receptor agonist
Source: PubMed Central journal article supplement (PMC9348577; doi:10.26508/lsa.202201424), 2022-07-29

Fig. 7A

Digitalized images (LAS3000 system) of blotted membranes after reassembly

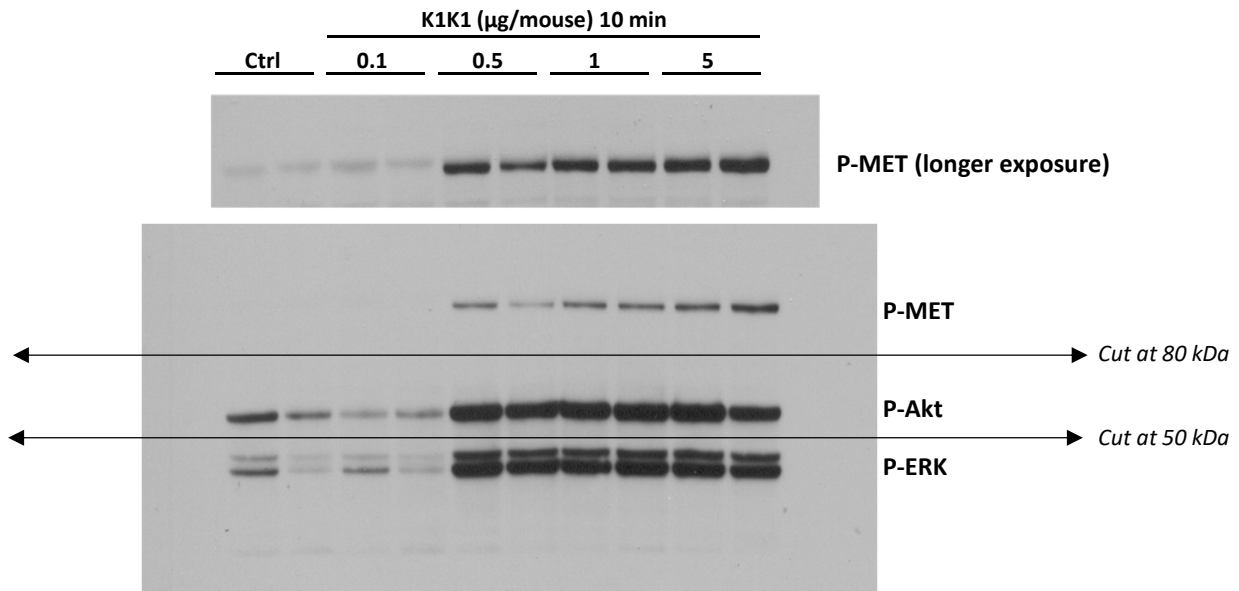

Membranes stripped and reprobed

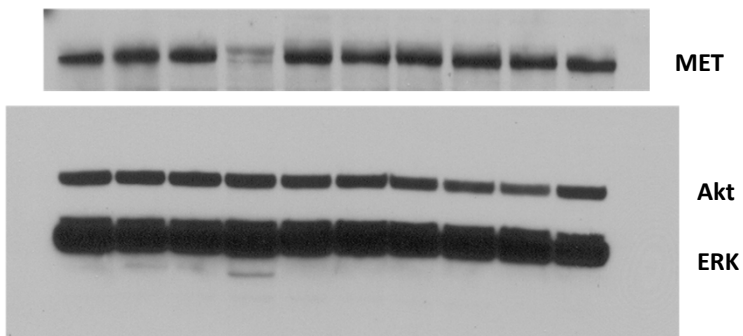

Fig. 7B

Digitalized images (LAS3000 system) of blotted membranes after reassembly

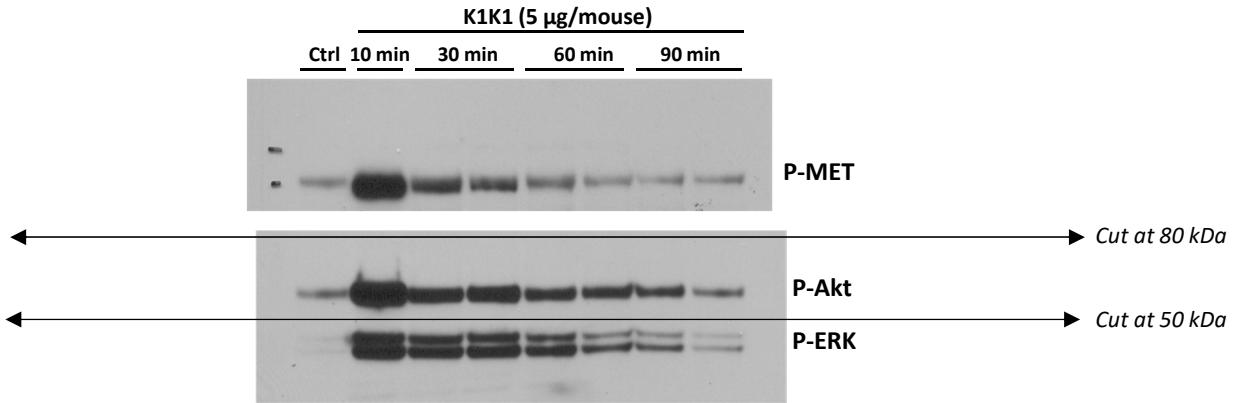

Membranes stripped and reprobbed

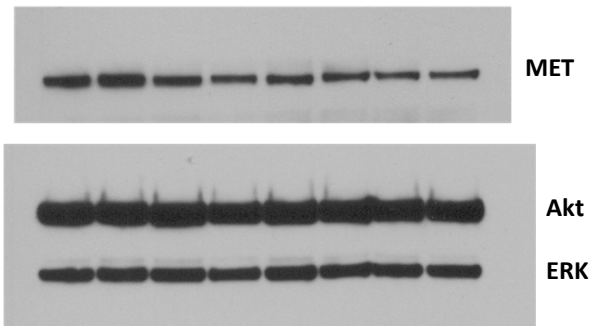

Supplement: LSA-2022-01424_SdataF7.pdf [file LSA-2022-01424_SdataF7.pdf]
