# Supplementary material for: Dimerization of kringle 1 domain from hepatocyte growth factor/scatter factor provides a potent MET receptor agonist
Source: PubMed Central journal article supplement (PMC9348577; doi:10.26508/lsa.202201424), 2022-07-29

Fig. S6

Digitalized images (LAS3000 system) of blotted membranes

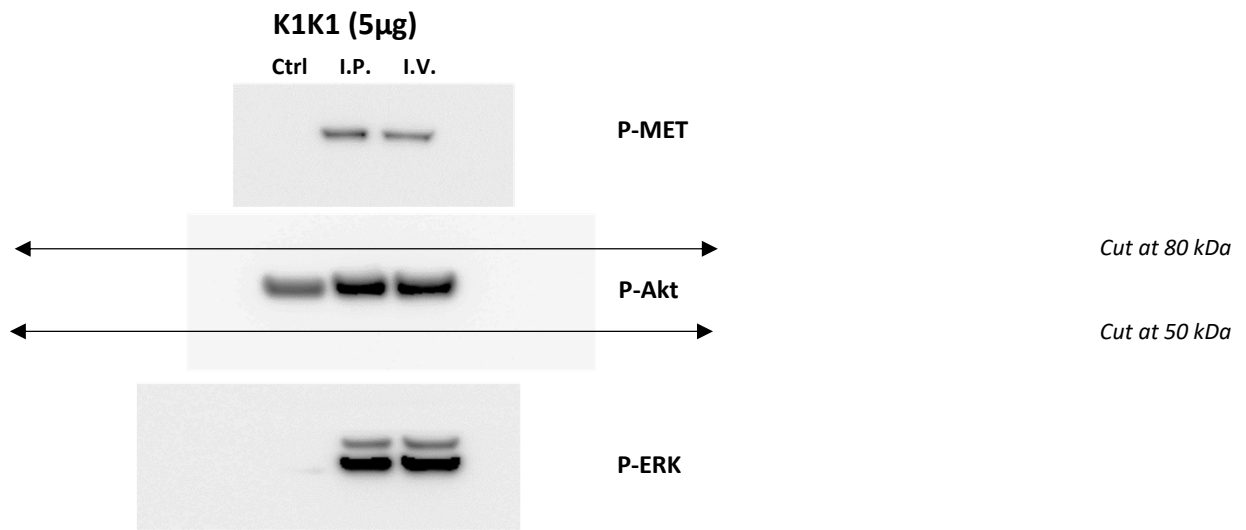

Membranes stripped and reprobed

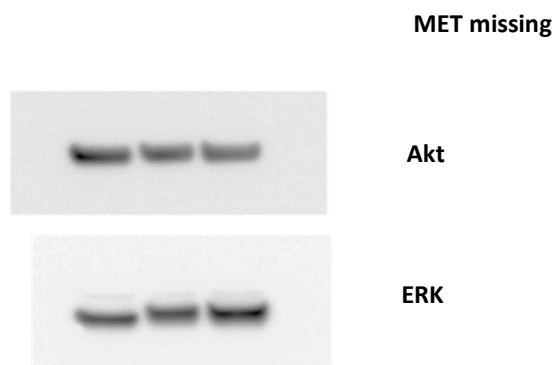

Supplement: LSA-2022-01424_SdataFS6.pdf [file LSA-2022-01424_SdataFS6.pdf]
